# Supplementary material for: The cepacian-like exopolysaccharide of Paraburkholderia ultramafica STM10279T enhances growth and metal adaptation of Tetraria comosa on New Caledonian ultramafic soil
Source: PubMed Central journal article supplement (PMC11188366; doi:10.3389/fpls.2024.1349724), 2024-06-05
Supplement: DataSheet_1.pdf [file DataSheet_1.pdf]

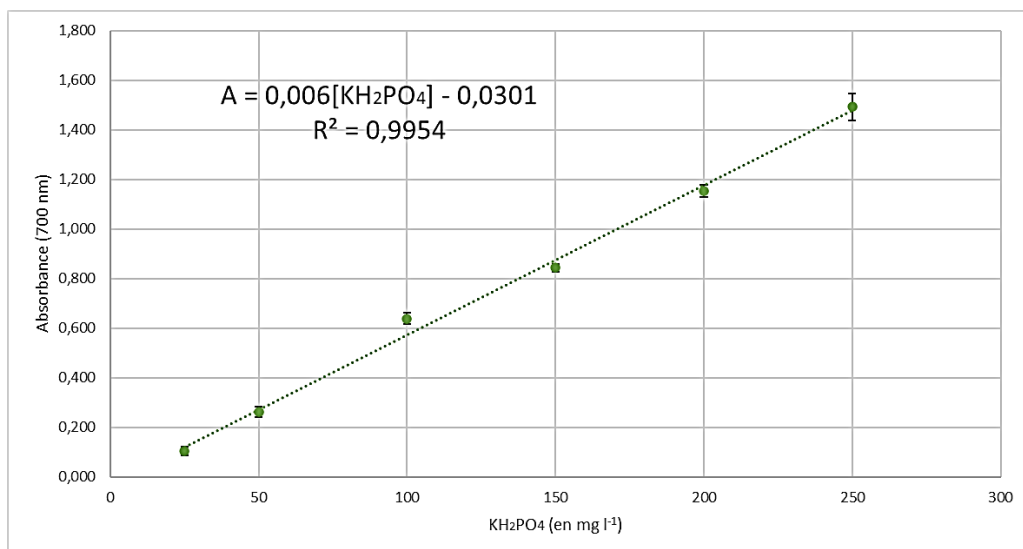

**Fig S1.** KH<sub>2</sub>PO<sub>4</sub> standard curve (mean values with standard errors; n = 4)

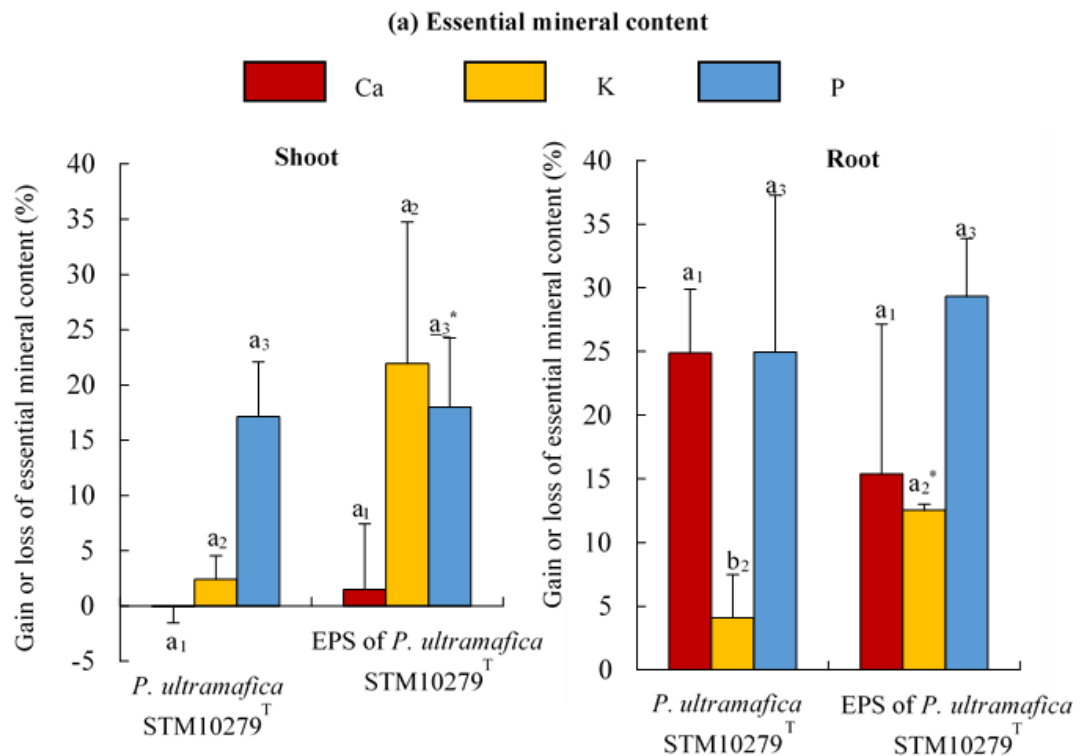

**Fig. S2** Effect of inoculation on essential mineral content of *Tetraria comosa* grown on ultramafic substrate. Relative variations of element content in shoots and roots are expressed as % of element content in dry mass of tissues of inoculated plants compared with controls. Bars represent means, and error bars represent standard deviation of means (n = 3). Different letters above columns indicate significant differences at P < 0.05. The same coefficient to letters refers to one element analysis. The letters and coefficients with an asterisk indicate significant differences with controls at P < 0.05.

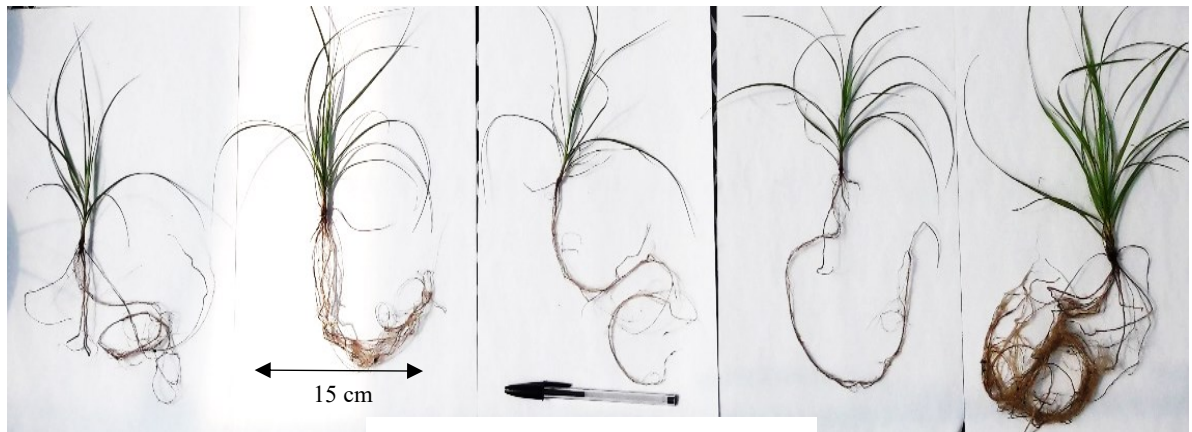

Control

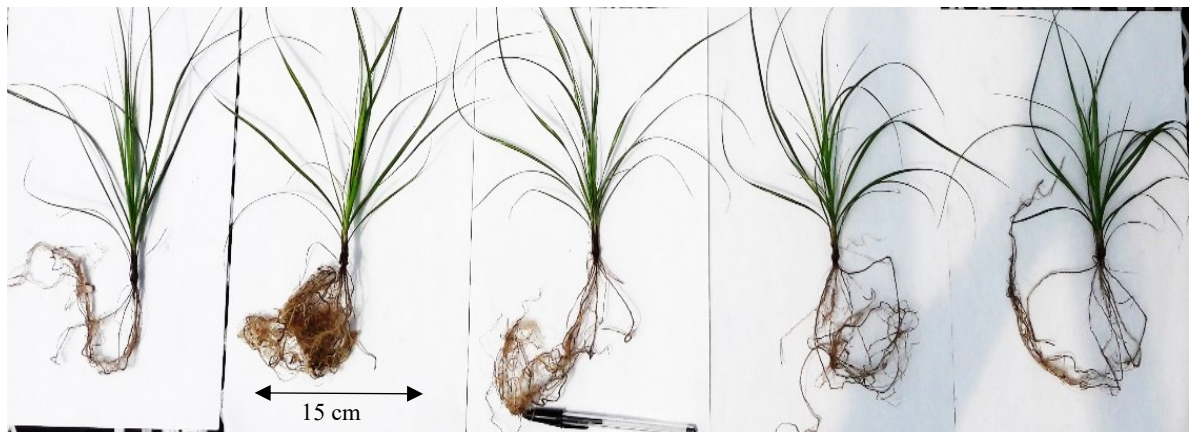

*Paraburkholderia ultramafica* STM10279<sup>T</sup>

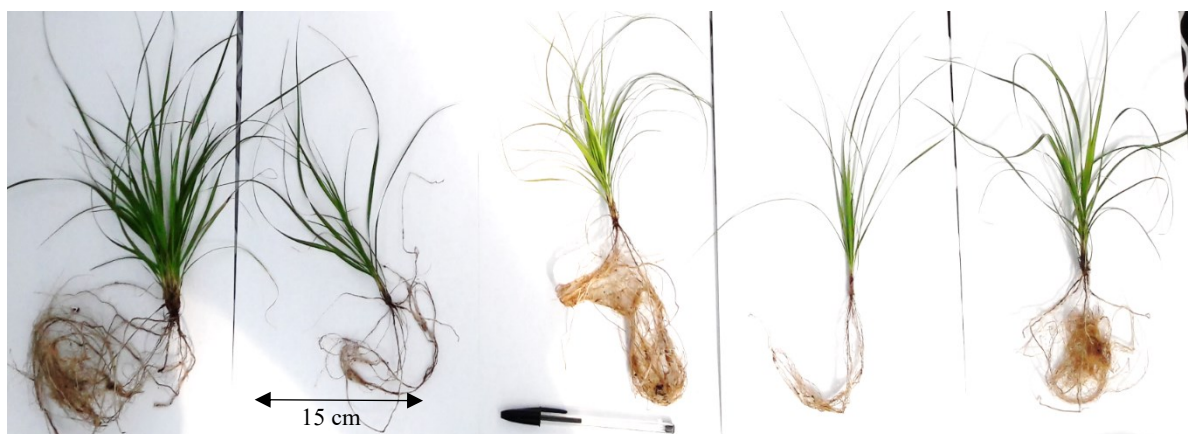

EPS of *Paraburkholderia ultramafica* STM10279<sup>T</sup>

**Fig S3.** Photographic report of *Tetraria comosa* removed from pots after 8 months of grown in ultramafic soil (5 samples representative of the average of growth).

## Supplementary Tables

**Table S1** Major characteristics of *Paraburkholderia ultramafica* STM10279<sup>T</sup> and the soil sampling site (Guentas et al., 2016; Bourles et al., 2020b).

| <i>P. ultramafica</i> STM10279 <sup>T</sup> |                                                                   |                                                        |
|---------------------------------------------|-------------------------------------------------------------------|--------------------------------------------------------|
| <b>Sampling characteristics</b>             |                                                                   |                                                        |
| <u>Plant Host species</u>                   | <i>Tetragia arundinacea</i>                                       |                                                        |
| <u>Site</u>                                 | Mont-Dore, Plum road<br>22°15'54"S; 166°35'57" E 22.26 S 166.59 E |                                                        |
| <u>Altitude</u>                             | 534 m                                                             |                                                        |
| <u>Geomorphological type*</u>               | Cambisol*                                                         |                                                        |
| <b>Soil main characteristics</b>            |                                                                   |                                                        |
| pH (H <sub>2</sub> O)                       | 5.2                                                               |                                                        |
|                                             | <b>Total (g Kg<sup>-1</sup>)</b>                                  | <b>Extractable Elements (DTPA, mg Kg<sup>-1</sup>)</b> |
| N                                           | 1.63                                                              |                                                        |
| P (g Kg <sup>-1</sup> )                     | 0.129                                                             |                                                        |
| Ca (g Kg <sup>-1</sup> )                    | 0.46                                                              |                                                        |
| Mg (g Kg <sup>-1</sup> )                    | 10.4                                                              |                                                        |
| Fe (g Kg <sup>-1</sup> )                    | 396                                                               | 95                                                     |
| Mn (g Kg <sup>-1</sup> )                    | 2.7                                                               | 76                                                     |
| Ni (g Kg <sup>-1</sup> )                    | 3.9                                                               | 162                                                    |
| Co (g Kg <sup>-1</sup> )                    | 0.44                                                              | 57                                                     |
| Cr (g Kg <sup>-1</sup> )                    | 20.4                                                              | 0.6                                                    |
| <b>Microbiological characteristics</b>      |                                                                   |                                                        |
| Range temperature (°C)                      | 20-32                                                             |                                                        |
| % NaCl                                      | 0-1                                                               |                                                        |
| pH optimum                                  | 5-6                                                               |                                                        |
| <b>Molecular characteristics</b>            |                                                                   |                                                        |
| 16S RNA seq EMBL                            | FR872407                                                          |                                                        |
| <b>Trace metal tolerance</b>                |                                                                   |                                                        |
|                                             | <b>IC<sub>50</sub> (mM)</b>                                       |                                                        |
| Ni                                          | 45.6 ± 5.3                                                        |                                                        |
| Co                                          | 3.9 ± 0.9                                                         |                                                        |
| Cr                                          | 0.5 ± 0.1                                                         |                                                        |
| Mn                                          | 32 ± 1.6                                                          |                                                        |
| <b>Plant Growth Promoting Traits</b>        |                                                                   |                                                        |
| Phosphate solubilization                    | +                                                                 |                                                        |
| Indole-3-acetic acid                        | +                                                                 |                                                        |
| NH <sub>3</sub>                             | +                                                                 |                                                        |
| Siderophore                                 | +                                                                 |                                                        |
| ACC deaminase                               | +                                                                 |                                                        |

Note : ACC, 1-aminocyclopropane-1-carboxylate deaminase.

\*Soil geomorphological definition according to FAO UNESCO and as reported by (Wulff et al, 2010)

**Table S2** KH<sub>2</sub>PO<sub>4</sub> standard curve

| <b>Concentration (mg l<sup>-1</sup>)</b> | <b>25</b> | <b>50</b> | <b>100</b> | <b>150</b> | <b>200</b> | <b>250</b> |
|------------------------------------------|-----------|-----------|------------|------------|------------|------------|
| <b>Absorbance (700 nm)</b>               | 0.090     | 0.257     | 0.616      | 0.829      | 1.124      | 1.573      |
|                                          | 0.087     | 0.235     | 0.622      | 0.828      | 1.143      | 1.455      |
|                                          | 0.119     | 0.281     | 0.658      | 0.854      | 1.172      | 1.47       |
|                                          | 0.121     | 0.278     | 0.656      | 0.859      | 1.173      | 1.471      |
| <b>Mean</b>                              | 0.104     | 0.263     | 0.638      | 0.843      | 1.153      | 1.492      |
| <b>Standard deviation</b>                | 0.018     | 0.021     | 0.022      | 0.016      | 0.024      | 0.054      |

**Table S3** Evaluation of the phosphorus solubilisation by the EPS of *P. ultramafica* STM10279<sup>T</sup> expressed in mg l<sup>-1</sup> of KH<sub>2</sub>PO<sub>4</sub>

| Sample                                                                             | EPS assay 1 | EPS assay 2 | EPS assay 3 | Control |
|------------------------------------------------------------------------------------|-------------|-------------|-------------|---------|
| Absorbance (700 nm)                                                                | 0.8         | 1.2         | 1.0         | 0.6     |
|                                                                                    | 0.8         | 1.2         | 1.0         | 0.6     |
|                                                                                    | 0.8         | 1.2         | 1.0         | 0.6     |
| Mean value                                                                         | 0.8         | 1.2         | 1.0         | 0.6     |
| $A_{\text{assay}} - A_{\text{control}}$                                            | 0.2         | 0.6         | 0.4         | 0.0     |
| Concentration P (mg l <sup>-1</sup> ) expressed in KH <sub>2</sub> PO <sub>4</sub> | 46.5        | 109.7       | 68.5        | 0.0     |
| Mean concentration (mg l <sup>-1</sup> )                                           | 74.9        |             |             |         |
| Standard deviation                                                                 | 32.1        |             |             |         |

**Table S4** Shoot and root biomasses of *Tetraria comosa* (mean  $\pm$  SE n=15) as a function of various treatments.

| Treatment                                          | Shoot biomass (mg)                           | Root biomass (mg)              |
|----------------------------------------------------|----------------------------------------------|--------------------------------|
| Control                                            | 243.3 $\pm$ 71.0b <sub>1</sub> <sup>†‡</sup> | 116.7 $\pm$ 45.9a <sub>2</sub> |
| <i>P. ultramafica</i> STM10279 <sup>T</sup>        | 391.0 $\pm$ 74.1ab <sub>1</sub>              | 151.8 $\pm$ 40.3a <sub>2</sub> |
| EPS of <i>P. ultramafica</i> STM10279 <sup>T</sup> | 548.7 $\pm$ 116.7a <sub>1</sub>              | 280.5 $\pm$ 79.8a <sub>2</sub> |

<sup>†</sup>Different letters in each column indicate significant differences at  $P < 0.05$ . <sup>‡</sup>Same coefficient to letters refers to one data analysis of one plant part (shoot or root).

**Table S5** Mineral element content in shoot and root of *Tetraria comosa* (mean  $\pm$  SE n = 3) as function of various treatment.

| Plant Part | Treatment                                          | Ca (g. Kg <sup>-1</sup> )                 | K (g. Kg <sup>-1</sup> )     | P (mg. Kg <sup>-1</sup> )   | Mg (g. Kg <sup>-1</sup> )   | Na (g. Kg <sup>-1</sup> )     |
|------------|----------------------------------------------------|-------------------------------------------|------------------------------|-----------------------------|-----------------------------|-------------------------------|
| Shoot      | Control                                            | 4.3 $\pm$ 0.3a <sub>1</sub> <sup>†‡</sup> | 9.2 $\pm$ 0.2a <sub>2</sub>  | 385 $\pm$ 27b <sub>3</sub>  | 1.6 $\pm$ 0.1a <sub>4</sub> | 0.53 $\pm$ 0.15a <sub>5</sub> |
|            | <i>P. ultramafica</i> STM10279 <sup>T</sup>        | 4.3 $\pm$ 0.1a <sub>1</sub>               | 9.4 $\pm$ 0.2a <sub>2</sub>  | 451 $\pm$ 19ab <sub>3</sub> | 1.6 $\pm$ 0.0a <sub>4</sub> | 0.92 $\pm$ 0.09a <sub>5</sub> |
|            | EPS of <i>P. ultramafica</i> STM10279 <sup>T</sup> | 4.4 $\pm$ 0.3a <sub>1</sub>               | 11.2 $\pm$ 1.2a <sub>2</sub> | 454 $\pm$ 24a <sub>3</sub>  | 1.5 $\pm$ 0.1a <sub>4</sub> | 0.36 $\pm$ 0.11a <sub>5</sub> |
| Root       | Control                                            | 1.6 $\pm$ 0.1a <sub>1</sub>               | 6.0 $\pm$ 0.0b <sub>2</sub>  | 260 $\pm$ 6a <sub>3</sub>   | 1.5 $\pm$ 0.0c <sub>4</sub> | 0.92 $\pm$ 0.02b <sub>5</sub> |
|            | <i>P. ultramafica</i> STM10279 <sup>T</sup>        | 2.0 $\pm$ 0.1a <sub>1</sub>               | 6.3 $\pm$ 0.2b <sub>2</sub>  | 325 $\pm$ 32a <sub>3</sub>  | 2.1 $\pm$ 0.1a <sub>4</sub> | 1.54 $\pm$ 0.14a <sub>5</sub> |
|            | EPS of <i>P. ultramafica</i> STM10279 <sup>T</sup> | 1.8 $\pm$ 0.2a <sub>1</sub>               | 6.8 $\pm$ 0.0a <sub>2</sub>  | 337 $\pm$ 12a <sub>3</sub>  | 1.7 $\pm$ 0.0b <sub>4</sub> | 0.59 $\pm$ 0.23b <sub>5</sub> |

<sup>†</sup>Different letters in each column indicate significant differences at P < 0.05. <sup>‡</sup>Same coefficient to letters refers to one data analysis of one element.



**Table S6** Element uptake in shoot and root of *Tetradia comosa* (mean  $\pm$  SE n = 3) as function of various treatment.

| Plant Part | Treatment                                          | Ca                                           | K                             | P                                | Mg                            | Na                             |
|------------|----------------------------------------------------|----------------------------------------------|-------------------------------|----------------------------------|-------------------------------|--------------------------------|
|            |                                                    | (mg. plant <sup>-1</sup> )                   | (mg. plant <sup>-1</sup> )    | ( $\mu$ g. plant <sup>-1</sup> ) | (mg. plant <sup>-1</sup> )    | (mg. plant <sup>-1</sup> )     |
| Shoot      | Control                                            | 1.04 $\pm$ 0.08c <sub>1</sub> <sup>†,‡</sup> | 2.24 $\pm$ 0.05c <sub>2</sub> | 94 $\pm$ 7c <sub>3</sub>         | 0.39 $\pm$ 0.02c <sub>4</sub> | 0.13 $\pm$ 0.04b <sub>5</sub>  |
|            | <i>P. ultramafica</i> STM10279 <sup>T</sup>        | 1.67 $\pm$ 0.02b <sub>1</sub>                | 3.68 $\pm$ 0.08b <sub>2</sub> | 176 $\pm$ 8b <sub>3</sub>        | 0.64 $\pm$ 0.01b <sub>4</sub> | 0.36 $\pm$ 0.03a <sub>5</sub>  |
|            | EPS of <i>P. ultramafica</i> STM10279 <sup>T</sup> | 2.39 $\pm$ 0.14a <sub>1</sub>                | 6.15 $\pm$ 0.65a <sub>2</sub> | 249 $\pm$ 13a <sub>3</sub>       | 0.80 $\pm$ 0.04a <sub>4</sub> | 0.20 $\pm$ 0.06ab <sub>5</sub> |
| Root       | Control                                            | 0.18 $\pm$ 0.01b <sub>1</sub>                | 0.70 $\pm$ 0.00c <sub>2</sub> | 30 $\pm$ 1c <sub>3</sub>         | 0.17 $\pm$ 0.00a <sub>4</sub> | 0.11 $\pm$ 0.00a <sub>5</sub>  |
|            | <i>P. ultramafica</i> STM10279 <sup>T</sup>        | 0.30 $\pm$ 0.01b <sub>1</sub>                | 0.95 $\pm$ 0.03b <sub>2</sub> | 49 $\pm$ 5b <sub>3</sub>         | 0.32 $\pm$ 0.01a <sub>4</sub> | 0.23 $\pm$ 0.02a <sub>5</sub>  |
|            | EPS of <i>P. ultramafica</i> STM10279 <sup>T</sup> | 0.51 $\pm$ 0.05a <sub>1</sub>                | 1.91 $\pm$ 0.01a <sub>2</sub> | 94 $\pm$ 3a <sub>3</sub>         | 0.46 $\pm$ 0.01a <sub>4</sub> | 0.16 $\pm$ 0.07a <sub>5</sub>  |

<sup>†</sup>Different letters in each column indicate significant differences at P < 0.05. <sup>‡</sup>Same coefficient to letters refers to one element uptake analysis.

**Table S7** Trace metal content in shoot and root of *Tetraria comosa* (mean  $\pm$  SE n = 3) as function of various treatment.

| Plant Part | Treatment                                          | Co   |                                       | Cr    |                          | Fe   |                         | Mn   |                         | Ni  |                        |
|------------|----------------------------------------------------|------|---------------------------------------|-------|--------------------------|------|-------------------------|------|-------------------------|-----|------------------------|
| Shoot      | Control                                            | 18.2 | $\pm$ 2.0a <sub>1</sub> <sup>†‡</sup> | 106   | $\pm$ 9.8a <sub>2</sub>  | 5.1  | $\pm$ 0.6a <sub>3</sub> | 466  | $\pm$ 8a <sub>4</sub>   | 258 | $\pm$ 5a <sub>5</sub>  |
|            | <i>P. ultramafica</i> STM10279 <sup>T</sup>        | 13.0 | $\pm$ 2.9a <sub>1</sub>               | 90.4  | $\pm$ 25.6a <sub>2</sub> | 3.7  | $\pm$ 1.0a <sub>3</sub> | 517  | $\pm$ 56a <sub>4</sub>  | 231 | $\pm$ 22a <sub>5</sub> |
|            | EPS of <i>P. ultramafica</i> STM10279 <sup>T</sup> | 10.1 | $\pm$ 0.9a <sub>1</sub>               | 66.5  | $\pm$ 1.1a <sub>2</sub>  | 2.9  | $\pm$ 0.1a <sub>3</sub> | 451  | $\pm$ 17a <sub>4</sub>  | 232 | $\pm$ 38a <sub>5</sub> |
| Root       | Control                                            | 48.5 | $\pm$ 6.0a <sub>1</sub>               | 212.4 | $\pm$ 31.0a <sub>2</sub> | 15.3 | $\pm$ 2.0a <sub>3</sub> | 882  | $\pm$ 86a <sub>4</sub>  | 246 | $\pm$ 32a <sub>5</sub> |
|            | <i>P. ultramafica</i> STM10279 <sup>T</sup>        | 82.6 | $\pm$ 7.0a <sub>1</sub>               | 417.3 | $\pm$ 40.5a <sub>2</sub> | 27.5 | $\pm$ 3.0a <sub>3</sub> | 1280 | $\pm$ 100a <sub>4</sub> | 410 | $\pm$ 35a <sub>5</sub> |
|            | EPS of <i>P. ultramafica</i> STM10279 <sup>T</sup> | 76.5 | $\pm$ 16.8a <sub>1</sub>              | 388.9 | $\pm$ 71.3a <sub>2</sub> | 24.5 | $\pm$ 5.2a <sub>3</sub> | 1280 | $\pm$ 238a <sub>4</sub> | 390 | $\pm$ 84a <sub>5</sub> |

<sup>†</sup>Different letters in each column indicate significant differences at P < 0.05. <sup>‡</sup>Same coefficient to letters refers to one data analysis of one metal.
